# Supplementary material for: Auxilin facilitates membrane traffic in the early secretory pathway
Source: PubMed Central journal article supplement — Mol Biol Cell. 2016 Jan 1;27(1):127–36. doi: 10.1091/mbc.E15-09-0631 (PMC4694752; doi:10.1091/mbc.e15-09-0631), 2016-01-01
Supplement: supp_E15-09-0631v1_CombinedSupMats.pdf [file supp_E15-09-0631v1_CombinedSupMats.pdf]

# Supplemental Materials

*Molecular Biology of the Cell*

Ding et al.

## **Supplementary Legends**

**Figure S1. Auxilin binds to Sec23 and Sec24.** (A) Purified recombinant GST, GST-Sec23, GST-Sec24 and GST-Sec31 (aa 1-500) were prebound to glutathione beads and then incubated with His<sub>6</sub>-Auxilin. After the incubation, the beads were washed and analyzed by western blot analysis using anti-His<sub>6</sub> antibody. (B) Ponceau S stain of the binding reactions shows equal loading of GST-Sec23, GST-Sec24 and GST-Sec 31(aa 1-500).

**A**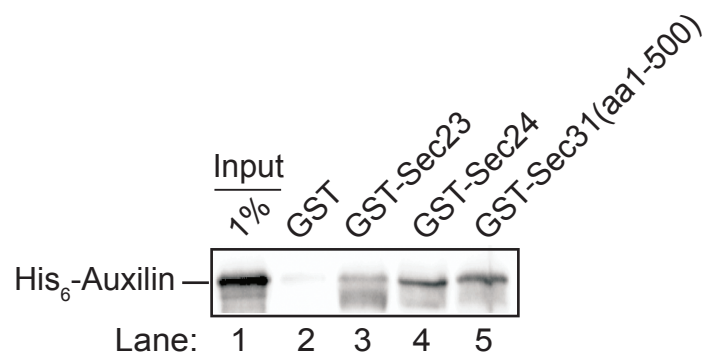**B**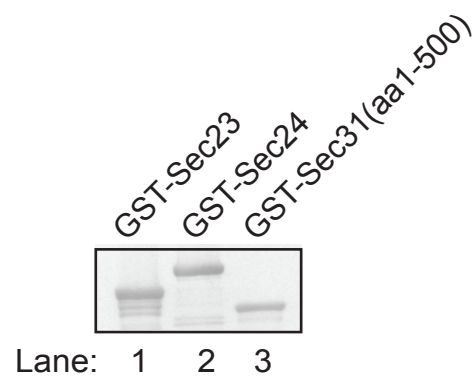

**Table S1. Yeast strains used in this study**

| Strain Number | Genotype                                                             | Source                      |
|---------------|----------------------------------------------------------------------|-----------------------------|
| SFNY998       | <i>MAT a, his3Δ1, leu2Δ0, met15Δ0, ura3Δ0</i>                        | Ferro-Novick Lab Collection |
| SFNY1415      | <i>MAT a, his3Δ1, leu2Δ0, met15Δ0, ura3Δ0, Ret1::COPI-TAP, HIS3</i>  | Ferro-Novick Lab Collection |
| SFNY1741      | <i>MAT a, his3Δ1, leu2Δ0, met15Δ0, ura3Δ0, Chc1::Chc1-TAP, HIS3</i>  | Ferro-Novick Lab Collection |
| SFNY1841      | <i>MAT a, ura3-52, leu2-3,112, his3Δ200</i>                          | Ferro-Novick Lab Collection |
| SFNY1842      | <i>MAT α, ura3-52, leu2-3, 112, his3Δ200</i>                         | Ferro-Novick Lab Collection |
| SFNY2672      | <i>MAT a, ura3-52, leu2-3,112, his3Δ200, swa2Δ::His3MX6</i>          | This study                  |
| SFNY2673      | <i>MAT a, ura3-52, leu2-3,112, his3Δ200, sec23-1</i>                 | This study                  |
| SFNY2674      | <i>MAT a, ura3-52, leu2-3,112, his3Δ200, swa2Δ::His3MX6, sec23-1</i> | This study                  |
| SFNY2675      | <i>MAT a, ura3-52, leu2-3,112, his3Δ200, sec24-1</i>                 | This study                  |
| SFNY2676      | <i>MAT a, ura3-52, leu2-3,112, his3Δ200, swa2Δ::His3MX6, sec24-1</i> | This study                  |
| SFNY2677      | <i>MAT a, ura3-52, leu2-3,112, his3Δ200, sec31-1</i>                 | This study                  |
| SFNY2678      | <i>MAT a, ura3-52, leu2-3,112, his3Δ200, swa2Δ::His3MX6, sec31-1</i> | This study                  |
| SFNY2679      | <i>MAT a, ura3-52, leu2-3,112, his3Δ200, sec21-1</i>                 | This study                  |

|          |                                                                      |                              |
|----------|----------------------------------------------------------------------|------------------------------|
| SFNY2680 | <i>MAT a, ura3-52, leu2-3,112, his3Δ200, swa2Δ::His3MX6, sec21-1</i> | This study                   |
| SFNY2681 | <i>MAT a, ura3-52, leu2-3,112, his3Δ200, sec27-1</i>                 | This study                   |
| SFNY2682 | <i>MAT a, ura3-52, leu2-3,112, his3Δ200, swa2Δ::His3MX6, sec27-1</i> | This study                   |
| SFNY2683 | <i>MAT α, ura3-52, leu2-3, 112, his3Δ200, swa2Δ::His3MX6</i>         | This study                   |
| SL1463   | <i>MATα, ura3-52, leu2, trp1, his3-Δ200, scd1-v</i>                  | Lemmon Lab<br>Collection     |
| SL4827   | <i>MATα, ura3-52, leu2Δ1, trp1Δ63, his3-Δ200, GAL-SWA2:TRP1</i>      | From Greg Payne<br>(GPY2598) |

**Table S2. Bacterial strains used in this study**

| Strain Number | Plasmid                                                         | Host strain     | Sources                     |
|---------------|-----------------------------------------------------------------|-----------------|-----------------------------|
| SFNB335       | pGEX3X                                                          | BL21 (DE3)pLysS | Ferro-Novick Lab Collection |
| SFNB773       | ORF of Aux1; inserted into the BamHI-EcoRI of pGEX4T-2          | DH5 $\alpha$    | Ferro-Novick Lab Collection |
| SFNB1337      | ORF of Sec13; inserted into BamHI-SalI of pGEX4T-2              | BL21            | Ferro-Novick Lab Collection |
| SFNB1346      | ORF of Sec23; inserted into pGEX2T                              | BL21            | Ferro-Novick Lab Collection |
| SFNB1486      | ORF of Sec31(aa1-500); inserted into BamHI-SalI of pGEX4T-3     | BL21            | Ferro-Novick Lab Collection |
| SFNB1729      | ORF of Aux1; inserted into XhoI-BamHI of pET15b                 | BL21(DE3)       | Ferro-Novick Lab Collection |
| SFNB1781      | ORF of Sec31(aa 879-1114); inserted into BamHI-NotI of pGEX4T-2 | XL1 blue cells  | Ferro-Novick Lab Collection |
| SFNB1860      | ORF of Sec31(aa 501-878);                                       | XL1 blue cells  | Ferro-Novick Lab Collection |
| SFNB1861      | ORF of Sec31(aa 1114-1274);                                     | XL1 blue cells  | Ferro-Novick Lab Collection |
| SFNB1906      | ORF of Sec24; inserted into SmaI-XhoI of pGEX6p-1               | BL-21-RIL       | Ferro-Novick Lab Collection |
| SFNB2257      | ORF of Aux1(aa 1-362); inserted into BamHI-XhoI of pGEX-6p-1    | Rosetta         | This study                  |
| SFNB2258      | ORF of Aux1(aa 362-561); inserted into BamHI-XhoI of pGEX-6p-1  | Rosetta         | This study                  |
| SFNB2259      | ORF of Aux1(aa 562-668); inserted into BamHI-XhoI of pGEX-6p-1  | Rosetta         | This study                  |

|          |                                                            |         |            |
|----------|------------------------------------------------------------|---------|------------|
| SFNB2260 | ORF of Sec31(aa 1-500); inserted into XhoI-BamHI of pET15b | Rosetta | This study |
|----------|------------------------------------------------------------|---------|------------|

**Supplemental Table S5: WT, all mass spec hits with slice info**

| Slice# | Gene       | Seq. Length | Protein name                                                                                        |
|--------|------------|-------------|-----------------------------------------------------------------------------------------------------|
| 3      | ADE4       | 510         | Amidophosphoribosyltransferase                                                                      |
| 5      | ADE4       | 510         | Amidophosphoribosyltransferase                                                                      |
| 6      | ADE4       | 510         | Amidophosphoribosyltransferase                                                                      |
| 7      | ADE4       | 510         | Amidophosphoribosyltransferase                                                                      |
| 8      | ADE4       | 510         | Amidophosphoribosyltransferase                                                                      |
| 9      | ADE4       | 510         | Amidophosphoribosyltransferase                                                                      |
| 6      | ADH1       | 348         | Alcohol Dehydrogenase                                                                               |
| 9      | AHP1       | 176         | Alkyl HydroPeroxide reductase                                                                       |
| 10     | AHP1       | 176         | Alkyl HydroPeroxide reductase                                                                       |
| 4      | APL2       | 726         | Beta Adaptin beta1 (AP-1 complex)                                                                   |
| 3      | APL4       | 832         | AP-1 complex Gamma                                                                                  |
| 3      | APL4       | 832         | AP-1 complex Gamma                                                                                  |
| 4      | APL4       | 832         | AP-1 complex Gamma                                                                                  |
| 5      | APM1       | 475         | AP-1 complex medium (mu)                                                                            |
| 8      | APM1       | 475         | AP-1 complex medium (mu)                                                                            |
| 9      | APS1       | 156         | AP-1 complex small (signa)                                                                          |
| 9      | ARF1       | 181         | Arf GTPase                                                                                          |
| 8      | ATG27      | 271         | Transmembrane protein involved in Autophagy                                                         |
| 7      | BMH1/BMH2  | 267/273     | 14-3-3 protein                                                                                      |
| 8      | BMH1/BMH2  | 267/273     | 14-3-3 protein                                                                                      |
| 3      | CDC19/PYK1 | 501         | Pyruvate Kinase                                                                                     |
| 5      | CDC19/PYK1 | 501         | Pyruvate Kinase                                                                                     |
| 1A     | CHC1       | 1653        | Clathrin heavy chain                                                                                |
| 1      | CHC1       | 1653        | Clathrin heavy chain                                                                                |
| 2      | CHC1       | 1653        | Clathrin heavy chain                                                                                |
| 3      | CHC1       | 1653        | Clathrin heavy chain                                                                                |
| 4      | CHC1       | 1653        | Clathrin heavy chain                                                                                |
| 5      | CHC1       | 1653        | Clathrin heavy chain                                                                                |
| 6      | CHC1       | 1653        | Clathrin heavy chain                                                                                |
| 9      | CHC1       | 1653        | Clathrin Heavy Chain                                                                                |
| 10     | CHC1       | 1653        | Clathrin Heavy Chain                                                                                |
| 6      | CLC1       | 233         | Clathrin Light Chain                                                                                |
| 7      | CLC1       | 233         | Clathrin Light Chain                                                                                |
| 8      | CLC1       | 233         | Clathrin Light Chain                                                                                |
| 9      | CLC1       | 233         | Clathrin Light Chain                                                                                |
| 10     | CLC1       | 233         | Clathrin Light Chain                                                                                |
| 3      | DNF2       | 1612        | Aminophospholipid translocase (flippase)                                                            |
| 8      | EGD2       | 174         | Alpha subunit of nascent polypeptide-associated complex                                             |
| 9      | EMP70      | 667         | Transmembrane 9 superfamily member 1/cell adhesion, filamentous growth, Endosome to vacuole sorting |
| 6      | ENO1/ENO2  | 437         | Enolase                                                                                             |
| 6      | ENO1/ENO2  | 437         | Enolase                                                                                             |
| 7      | ENO1/ENO2  | 437         | Enolase                                                                                             |



|    |                |           |                                                                   |
|----|----------------|-----------|-------------------------------------------------------------------|
| 8  | ENO2           | 437       | Enolase 2                                                         |
| 4  | ENT5           | 411       | Golgi Epsin                                                       |
| 5  | ENT5           | 411       | Golgi Epsin                                                       |
| 4  | FAA1           | 700       | Long Chain fatty acyl-CoA synthase                                |
| 1A | FAS1           | 2051      | Beta subunit of fatty acid synthetase                             |
| 1A | FAS2           | 1887      | Alpha subunit of fatty acid synthetase                            |
| 6  | FBA1           | 359       | Fructose 1,6-bisphosphate aldolase                                |
| 6  | FCY2           | 533       | Purine-cytosine permease                                          |
| 1A | GSC2           | 1895      | 1,3-beta-D-glucan synthase                                        |
| 1  | FKS1           | 1876      | 1,3-beta-D-glucan synthase                                        |
| 2  | FKS1           | 1876      | 1,3-beta-D-glucan synthase                                        |
| 3  | FKS1           | 1876      | 1,3-beta-D-glucan synthase                                        |
| 3  | FKS1/GSC2      | 1876/1895 | 1,3-beta-D-glucan synthase                                        |
| 2  | GAS1           | 559       | 1,3-beta-glucanosyltransferase                                    |
| 3  | GAS1           | 559       | Glycolipid anchored protein                                       |
| 9  | GEF1           | 779       | Cl-channel-lateGolgi/Endo                                         |
| 8  | GOS1           | 223       | T-SNARE invovled in ER to Golgi Transport                         |
| 8  | GPM1           | 247       | Phophoglycerate mutase 1                                          |
| 6  | HXT3           | 567       | Low-affinity glucose transporter                                  |
| 1A | HXT6/HXT7      | 570       | High-affinity hexose transporter                                  |
| 6  | HXT6/HXT7      | 570       | High-affinity hexose transporter                                  |
| 7  | IPP1           | 287       | Inorganic pyrophosphatase                                         |
| 3  | MDR1/GYP2/MIC1 | 950       | GAP for Rabs Ypt6, Ypt31, Sec4                                    |
| 5  | NAP1           | 417       | Nucleosome assembly protein                                       |
| 9  | NCE102         | 173       | Non-classicle export protein 2; Eisosome organization, PM protein |
| 5  | PDC1           | 563       | Pyruvate Decarboxylase                                            |
| 1A | PDR5           | 1511      | Multi drug resistance transporter                                 |
| 1  | PDR5           | 1511      | Multi drug resistance transporter                                 |
| 2  | PDR5           | 1511      | Multi drug resistance transporter                                 |
| 3  | PDR5           | 1522      | Multi drug resistance transporter                                 |
| 6  | PEP4           | 405       | Vacuolar aspartyl protease (proteinase A)                         |
| 6  | PEP8/VPS26     | 379       | Retromer subunit                                                  |
| 3  | PFK2           | 959       | phosphofructokinase 2                                             |
| 6  | PGK1           | 416       | Phosphoglycerate Kinase                                           |
| 6  | PGK1           | 416       | Phosphoglycerate Kinase                                           |
| 7  | PGK1           | 416       | Phosphoglycerate Kinase                                           |
| 7  | PGK1           | 416       | Phosphoglycerate Kinase                                           |
| 8  | PGK1           | 416       | Phosphoglycerate Kinase                                           |
| 3  | PMA1           | 918       | PM ATPase 1                                                       |
| 3  | PMA1           | 918       | PM ATPase 1                                                       |
| 3  | PMA1           | 918       | PM ATPase 1                                                       |
| 9  | PST2           | 198       | Flavodoxin-like fold ( paralog RFS1)                              |
| 6  | RAS2           | 322       | GTP binding protein, Ras-like protein 2                           |
| 8  | RFS1           | 210       | Flavodoxin-like fold ( like Pst2 YCp4) PM punctate Loc.           |

|    |               |         |                                                                                          |
|----|---------------|---------|------------------------------------------------------------------------------------------|
| 8  | RHO1          | 209     | Rho GTPase Rho1                                                                          |
| 9  | RPL11A/RPL11B | 174     | 60S ribosomal protein L11                                                                |
| 9  | RPL12A/RPL12B | 165     | 60S ribosomal protein L12                                                                |
| 9  | RPL18         | 152     | S.pombe 60S ribosomal protein L18                                                        |
| 9  | RPL25         | 142     | 60S ribosomal protein L25                                                                |
| 10 | RPL25         | 142     | 60S ribosomal protein L25                                                                |
| 9  | RPL28         | 149     | 60S ribosomal protein L28                                                                |
| 10 | RPL30         | 105     | 60S ribosomal protein L30                                                                |
| 7  | RPL5          | 297     | 60S ribosomal subunit L5                                                                 |
| 8  | RPL7A/RPL7B   | 244     | 60S ribosomal protein L7                                                                 |
| 8  | RPL9A         | 191     | 60S ribosomal protein L9                                                                 |
| 10 | RPP1B         | 106     | 60S acidic ribosomal protein P1-beta                                                     |
| 10 | RPP2B         | 110     | 60S acidic ribosomal protein P2-beta                                                     |
| 9  | RPS13         | 151     | 40S ribosomal protein S13                                                                |
| 9  | RPS13         | 151     | 40S ribosomal protein S13                                                                |
| 10 | RPS14A/RPS14B | 137/138 | 40S ribosomal protein S14                                                                |
| 9  | RPS16A/RPS16B | 143     | 40S ribosomal protein S16                                                                |
| 10 | RPS16A/RPS16B | 143     | 40S ribosomal protein S16                                                                |
| 9  | RPS18A/RPS18B | 146     | 40S ribosomal protein S18                                                                |
| 10 | RPS24A/RSP24B | 135     | 40S ribosomal protein S24                                                                |
| 8  | RPS3          | 240     | 40S Ribosomal Protein S3                                                                 |
| 8  | RPS3          | 240     | 40S ribosomal protein S3                                                                 |
| 9  | RPS3          | 240     | 40S Ribosomal Protein S3                                                                 |
| 10 | RPS30A/RPS30B | 63      | 40S ribosomal protein S30                                                                |
| 8  | RPS4A/RPS4B   | 261     | 40S Ribosomal Protein S4                                                                 |
| 8  | RPS5          | 225     | 40S ribosomal protein S5                                                                 |
| 8  | RPS5          | 225     | 40S ribosomal protein S5                                                                 |
| 9  | RPS5          | 225     | 40S ribosomal protein S5                                                                 |
| 10 | RPS5          | 225     | 40S ribosomal protein S5                                                                 |
| 7  | SEC17         | 292     | Alpha SNAP/vesicle fusion                                                                |
| 8  | SEC17         | 292     | Alpha SNAP/vesicle fusion                                                                |
| 8  | SEC4          | 215     | RAB GTPase Sec4 (Golgi to PM)                                                            |
| 8  | SFT2          | 215     | Tetra-spanin membrane protein of late Golgi, retrograde transport from endosome to Golgi |
| 9  | SFT2          | 215     | Tetra-spanin membrane protein of late Golgi, retrograde transport from endosome to Golgi |
| 6  | SHM2          | 469     | Serine hydroxymethyltransferase, cytosolic                                               |
| 3  | SKN1          | 771/720 | Protein involved in sphingolipid synth                                                   |
| 9  | SNC2          | 115     | v-snare for transport from Golgi to PM (SNC1 homologue)                                  |
| 10 | SNC2          | 115     | v-snare for transport from Golgi to PM (SNC1 homologue)                                  |
| 6  | SNX4          | 423     | Sorting nexin-4                                                                          |
| 8  | SNX4          | 423     | Sorting nexin-4                                                                          |
| 4  | SSA1          | 649     | HSC chaperone SSA family                                                                 |
| 4  | SSB1          | 613     | HSC chaperone SSB family                                                                 |
| 4  | SSB1          | 613     | HSC chaperone SSB family                                                                 |
| 6  | SSB1/SSB2     | 613     | HSC chaperone SSB family                                                                 |

|    |                    |      |                                                          |
|----|--------------------|------|----------------------------------------------------------|
| 10 | STE18              | 110  | Trimeric G protein gamma subunit                         |
| 4  | STE7               | 515  | Ser Thre Prot Kinase/MAP Kinase Kinase                   |
| 6  | SUR7               | 302  | Plasma membrane protein, Eisosome component              |
| 7  | SUR7               | 302  | Plasma membrane protein, Eisosome component              |
| 8  | SUR7               | 302  | Plasma membrane protein, Eisosome component              |
| 4  | TCB2               | 1178 | ER protein: ER-PM tethering                              |
| 6  | TDH1/TDH2/TDH3     | 332  | glyceraldehyde-3-phosphate dehydrogenase                 |
| 7  | TDH2               | 332  | glyceraldehyde-3-phosphate dehydrogenase 2               |
| 7  | TDH3               | 332  | glyceraldehyde-3-phosphate dehydrogenase 3               |
| 8  | TDH3               | 332  | glyceraldehyde-3-phosphate dehydrogenase 3               |
| 8  | TDH3               | 332  | glyceraldehyde-3-phosphate dehydrogenase 3               |
| 9  | TDH3               | 332  | glyceraldehyde-3-phosphate dehydrogenase 3               |
| 6  | TEF1/TEF2          | 458  | Translation elongation factor 1-alpha                    |
| 8  | TEF1/TEF2          | 458  | Translation elongation factor 1-alpha                    |
| 8  | TPI1               | 248  | Triosephosphate isomerase                                |
| 10 | TRS31              | 238  | Core subunit of TRAPP complex I-III (GEFs for Ypt1)      |
| 9  | TSA1               | 196  | Thioredoxin peroxidase                                   |
| 4  | Virus Protein L-A  | 1505 | Viral poly protein Virus L-A                             |
| 3  | Virus Protein L-BC | 1512 | Viral poly protein Virus L-BC                            |
| 4  | Virus Protein L-BC | 1512 | Viral poly protein Virus L-BC                            |
| 5  | Virus Protein L-BC | 1512 | Viral poly protein Virus L-BC                            |
| 6  | Virus Protein L-BC | 1512 | Viral poly protein Virus L-BC                            |
| 7  | Virus Protein L-BC | 1512 | Viral poly protein Virus L-BC                            |
| 8  | Virus Protein L-BC | 1512 | Viral poly protein Virus L-BC                            |
| 9  | Virus Protein L-BC | 1512 | Viral poly protein Virus L-BC                            |
| 5  | Vma2               | 517  | Subunit B of V1 peripheral domain of vacuolar ATPase     |
| 6  | VMA6               | 345  | V-type proton ATPase subunit d                           |
| 1A | VPS10/PEP1         | 1579 | Sorting receptor for Vac Hydrolases                      |
| 2  | VPS10/PEP1         | 1579 | CPY sorting receptor                                     |
| 3  | VPS10/PEP1         | 1579 | CPY sorting receptor                                     |
| 3  | Vps35              | 944  | Retromer subunit                                         |
| 8  | VTI1               | 217  | v-Snare, interacts w/Sed5+Pep12                          |
| 3  | YEF3               | 1044 | Translation elongation factor EF-3A                      |
| 8  | YIP4               | 235  | Trans Membrane Protein of Late Golgi that bnds YPTs      |
| 7  | YIP5               | 310  | Transmembrane protein of late Golgi that binds YPTs      |
| 9  | YMR295C            | 197  | Unknown function. Localization to cell periphery and bud |
| 8  | YPT1               | 206  | RAB GTPase Ypt1                                          |
| 9  | ZEO1               | 113  | Zeocin resistance protein; Cell integrity pathway        |
|    |                    |      |                                                          |

**Supplemental Table S6: Auxilin depletion, all MS hits with slice info**

| Slice# | Gene       | Seq. Length | Protein name                                                    |
|--------|------------|-------------|-----------------------------------------------------------------|
| 1      | ACC1       | 2233        | Acetyl-CoA carboxylase                                          |
| 3      | ADE3       | 946         | C1-tetrahydrofolate synthase                                    |
| 3      | ADE4       | 510         | Amidophosphoribosyltransferase                                  |
| 4      | ADE4       | 510         | Amidophosphoribosyltransferase                                  |
| 5      | ADE4       | 510         | Amidophosphoribosyltransferase                                  |
| 6      | ADE4       | 510         | Amidophosphoribosyltransferase                                  |
| 7      | ADE4       | 510         | Amidophosphoribosyltransferase                                  |
| 8      | ADE4       | 510         | Amidophosphoribosyltransferase                                  |
| 9      | ADE4       | 510         | Amidophosphoribosyltransferase                                  |
| 10     | ADE4       | 510         | Amidophosphoribosyltransferase                                  |
| 6      | ADH1       | 348         | Alcohol Dehydrogenase                                           |
| 9      | AHP1       | 177         | Thiol-specific peroxiredoxin                                    |
| 3      | APL4       | 832         | AP-1 complex Gamma                                              |
| 4      | APL4       | 832         | AP-1 complex Gamma                                              |
| 5      | APM1       | 475         | AP-1 complex medium (mu)                                        |
| 5      | APM1       | 475         | AP-1 complex medium (mu)                                        |
| 6      | APM1       | 475         | AP-1 complex medium (mu)                                        |
| 6      | APM1       | 475         | AP-1 complex medium (mu)                                        |
| 9      | APS1       | 156         | AP-1 adaptor                                                    |
| 10     | APS1       | 156         | AP-1 adaptor                                                    |
| 7      | ASC1       | 319         | G-protein beta subunit/guanine dissociation inhibitor for Gpa2p |
| 8      | ATG27      | 271         | Transmembrane protein involved in Autophagy                     |
| 7      | BMH1/BMH2  | 267/273     | 14-3-3 protein                                                  |
| 5      | CDC19      | 501         | Pyruvate Kinase                                                 |
| 9      | CDC19      | 501         | Pyruvate Kinase                                                 |
| 10     | CDC19      | 501         | Pyruvate Kinase                                                 |
| 5      | CDC19/PYK1 | 501         | Pyruvate Kinase                                                 |
| 3      | CDC48      | 835         | AAA ATPase                                                      |
| 6      | CDC48      | 835         | AAA ATPase                                                      |
| 1      | CHC1       | 1653        | Clathrin Heavy Chain                                            |
| 2      | CHC1       | 1653        | Clathrin Heavy Chain                                            |
| 3      | CHC1       | 1653        | Clathrin Heavy Chain                                            |
| 4      | CHC1       | 1653        | Clathrin Heavy Chain                                            |
| 5      | CHC1       | 1653        | Clathrin Heavy Chain                                            |
| 6      | CHC1       | 1653        | Clathrin Heavy Chain                                            |
| 7      | CHC1       | 1653        | Clathrin Heavy Chain                                            |
| 3      | CLC1       | 233         | Clathrin Light Chain                                            |
| 6      | CLC1       | 233         | Clathrin Light Chain                                            |
| 7      | CLC1       | 233         | Clathrin Light Chain                                            |
| 8      | CLC1       | 233         | Clathrin Light Chain                                            |
| 9      | CLC1       | 233         | Clathrin Light Chain                                            |
| 10     | CLC1       | 233         | Clathrin Light Chain                                            |
| 3      | CLU1/TIF1  | 1277        | EIF3-TL initiation factor                                       |
| 4      | CPS1       | 576         | Vacuolar carboxypeptidase S                                     |
| 5      | CPS1       | 576         | Vacuolar carboxypeptidase S                                     |
| 1      | DRS2       | 1355        | TGN aminophospholipid translocase (flippase)                    |

|    |                |           |                                                            |
|----|----------------|-----------|------------------------------------------------------------|
| 3  | DRS2           | 1355      | TGN aminophospholipid translocase (flippase)               |
| 3  | ECM33          | 429       | GPI-anchored protein of unknown function                   |
| 9  | EMP24          | 203       | Member of the p24 family involved in ER to Golgi transport |
| 6  | EMP47          | 445       | Integral membrane component of ER-derived COPII vesicles   |
| 3  | ENO1           | 437       | Enolase                                                    |
| 5  | ENO2           | 437       | Enolase                                                    |
| 6  | ENO2           | 437       | Enolase                                                    |
| 8  | ERP1           | 219       | Member of the p24 family involved in ER to Golgi transport |
| 9  | ERP1           | 219       | Member of the p24 family involved in ER to Golgi transport |
| 10 | ERP1           | 219       | Member of the p24 family involved in ER to Golgi transport |
| 10 | ERP1           | 219       | Member of the p24 family involved in ER to Golgi transport |
| 8  | ERP2           | 215       | Member of the p24 family involved in ER to Golgi transport |
| 10 | Erv14          | 138       | COPII-coated vesicle protein                               |
| 8  | ERV25          | 211       | Member of the p24 family involved in ER to Golgi transport |
| 9  | ERV25          | 211       | Member of the p24 family involved in ER to Golgi transport |
| 1  | FAS1           | 2051      | Beta subunit of fatty acid synthetase                      |
| 5  | FAS2           | 1887      | Alpha subunit of fatty acid synthetase                     |
| 10 | FAS2           | 1887      | Alpha subunit of fatty acid synthetase                     |
| 6  | FBA1           | 359       | Fructose 1,6-bisphosphate aldolase                         |
| 10 | FET3           | 636       | Ferro-O2-oxidoreductase, Iron uptake, TM protein           |
| 1  | FKS1           | 1876      | 1,3-beta-D-glucan synthase                                 |
| 3  | FKS1           | 1876      | 1,3-beta-D-glucan synthase                                 |
| 3  | FKS1           | 1876      | 1,3-beta-D-glucan synthase                                 |
| 3  | FKS1/GSC2      | 1876/1895 | 1,3-beta-D-glucan synthase                                 |
| 10 | FKS1/GSC2      | 1876/1895 | 1,3-beta-D-glucan synthase                                 |
| 1  | GSC2           | 1895      | 1,3-beta-D-glucan synthase                                 |
| 3  | GSC2           | 1895      | 1,3-beta-D-glucan synthase                                 |
| 3  | GSC2           | 1895      | 1,3-beta-D-glucan synthase                                 |
| 3  | GAS1           | 559       | Glycolipid anchored protein                                |
| 3  | GAS1           | 559       | Glycolipid anchored protein                                |
| 7  | GCN3           | 305       | Alpha subunit of translation initiation factor eIF2B       |
| 9  | GEF1           | 779       | Cl-channel-lateGolgi/Endo                                  |
| 6  | GPM1           | 247       | Phophoglycerate mutase 1                                   |
| 4  | GSY2           | 705       | glycogen synthase                                          |
| 1  | HXT6           | 570       | High-affinity hexose transporter                           |
| 3  | HXT6           | 570       | High-affinity hexose transporter                           |
| 3  | HXT6           | 570       | High-affinity hexose transporter                           |
| 6  | HXT6           | 570       | High-affinity hexose transporter                           |
| 6  | HXT7           | 570       | High-affinity hexose transporter                           |
| 3  | KEX1           | 729       | Transmembrane carboxypeptidase of TGN                      |
| 5  | KRE2/MNT1      | 442       | Alpha1,2-mannosyltransferase of the Golgi                  |
| 6  | LSP1           | 341       | Eisosome core component                                    |
| 3  | MDR1/GYP2/MIC1 | 950       | GAP for Rabs Ypt6, Ypt31, Sec4                             |
| 3  | PFK1?          | 987       | phosphofructokinase 2                                      |
| 3  | PFK2           | 959       | phosphofructokinase 2                                      |
| 3  | PFK2           | 959       | phosphofructokinase 2                                      |
| 4  | PFK2           | 959       | phosphofructokinase 2                                      |
| 6  | PFK2           | 959       | phosphofructokinase 2                                      |
| 6  | PFK2           | 959       | phosphofructokinase 2                                      |

|    |           |         |                                                    |
|----|-----------|---------|----------------------------------------------------|
| 7  | PFK2      | 959     | phosphofructokinase 2                              |
| 3  | PGK1      | 417     | Phosphoglycerate kinase                            |
| 6  | PGK1      | 417     | Phosphoglycerate kinase                            |
| 6  | PGK1      | 417     | Phosphoglycerate kinase                            |
| 8  | PHO84     | 587     | High-affinity inorganic phosphate (Pi) transporter |
| 7  | PIL1      | 339     | Eisosome core component                            |
| 6  | PIL1      | 339     | Eisosome core component                            |
| 9  | PIL1      | 339     | Eisosome core component                            |
| 1  | PMA1      | 918     | PM ATPase                                          |
| 3  | PMA1      | 918     | PM ATPase                                          |
| 3  | PMA1/2    | 918/947 | PM ATPase                                          |
| 3  | PMA1/2    | 918/947 | PM ATPase                                          |
| 5  | PMA1/PMA2 | 918/947 | PM ATPase                                          |
| 6  | PMA1/PMA2 | 918/947 | PM ATPase                                          |
| 1  | PMA2      | 947     | PM ATPase                                          |
| 3  | PMA2      | 947     | PM ATPase                                          |
| 4  | PMA2/PMA1 | 947/918 | PM ATPase                                          |
| 8  | RET2      | 546     | Delta subunit of CopI Coatmer                      |
| 8  | RHO1      | 209     | Rho GTPase Rho1                                    |
| 6  | RPG1      | 964     | eIF3alpha translation initiation subunit           |
| 9  | RPL11A/B  | 174     | ribosomal 60S subunit protein L11                  |
| 10 | Rpl12A/B  | 165     | ribosomal 60S subunit protein L12                  |
| 9  | Rpl12A/B  | 165     | ribosomal 60S subunit protein L12                  |
| 9  | RPL14     | 138     | ribosomal 60S subunit protein L14                  |
| 9  | RPL14     | 138     | ribosomal 60S subunit protein L14                  |
| 10 | Rpl14     | 138     | ribosomal 60S subunit protein L14                  |
| 10 | Rpl14     | 138     | ribosomal 60S subunit protein L14                  |
| 9  | RPL17A    | 184     | ribosomal 60S subunit protein L17                  |
| 9  | RPL20     | 172     | Ribosomal 60S subunit protein L20                  |
| 10 | Rpl20     | 172     | Ribosomal 60S subunit protein L20                  |
| 10 | Rpl22     | 122     | Ribosomal 60S subunit protein L22                  |
| 8  | RPL22A    | 122     | Ribosomal 60S subunit protein L22                  |
| 9  | RPL22A    | 122     | Ribosomal 60S subunit protein L22                  |
| 10 | RPL23A/B  | 137     | Ribosomal 60S subunit protein L23                  |
| 9  | RPL25     | 142     | Ribosomal 60S subunit protein L25                  |
| 9  | RPL25     | 142     | Ribosomal 60S subunit protein L25                  |
| 9  | RPL25     | 142     | Ribosomal 60S subunit protein L25                  |
| 10 | Rpl25     | 142     | Ribosomal 60S subunit protein L25                  |
| 10 | Rpl25     | 142     | Ribosomal 60S subunit protein L25                  |
| 9  | Rpl27     | 136     | Ribosomal 60S subunit protein L27                  |
| 10 | Rpl27     | 136     | Ribosomal 60S subunit protein L27                  |
| 9  | Rpl28     | 149     | Ribosomal 60S subunit protein L28                  |
| 6  | RPL2A     | 254     | Ribosomal 60S subunit protein L2                   |
| 6  | RPL3      | 387     | Ribosomal 60S subunit protein L3                   |
| 6  | RPL3      | 387     | Ribosomal 60S subunit protein L3                   |
| 10 | Rpl3      | 387     | Ribosomal 60S subunit protein L3                   |
| 10 | Rpl30     | 105     | Ribosomal 60S subunit protein L30                  |
| 9  | Rpl32     | 130     | Ribosomal 60S subunit protein L32                  |
| 10 | RPL33A    | 107     | Ribosomal 60S subunit protein L33                  |

|    |          |     |                                                                     |
|----|----------|-----|---------------------------------------------------------------------|
| 10 | Rpl33B   | 107 | Ribosomal 60S subunit protein L33                                   |
| 10 | Rpl35    | 120 | Ribosomal 60S subunit protein L35                                   |
| 10 | Rpl38    | 78  | Ribosomal 60S subunit protein L38                                   |
| 6  | RPL4     | 362 | Ribosomal 60S subunit protein L4                                    |
| 6  | RPL4     | 362 | Ribosomal 60S subunit protein L4                                    |
| 8  | RPL4A/B  | 362 | Ribosomal 60S subunit protein L4                                    |
| 6  | RPL40    | 128 | Ubiquitin-ribosomal 60S subunit protein L40A fusion protein         |
| 6  | RPL40    | 128 | Ubiquitin-ribosomal 60S subunit protein L40A fusion protein         |
| 6  | RPL5     | 297 | Ribosomal 60S subunit protein L5                                    |
| 7  | Rpl5     | 297 | Ribosomal 60S subunit protein L5                                    |
| 9  | RPL5     | 297 | Ribosomal 60S subunit protein L5                                    |
| 9  | Rpl5     | 297 | Ribosomal 60S subunit protein L5                                    |
| 7  | RPL7A/B  | 244 | Ribosomal 60S subunit protein L7                                    |
| 8  | RPL7A/B  | 244 | Ribosomal 60S subunit protein L7                                    |
| 7  | RPP0     | 312 | Ribosomal protein P0 of the ribosomal stalk                         |
| 8  | RPP0     | 312 | Ribosomal protein P0 of the ribosomal stalk                         |
| 8  | RPP0     | 312 | Ribosomal protein P0 of the ribosomal stalk                         |
| 10 | Rpp1A    | 106 | Ribosomal Protein P1 Alpha                                          |
| 10 | Rpp1B    | 106 | Ribosomal Protein P1 Beta                                           |
| 10 | Rpp2A    | 106 | Ribosomal protein P2 alpha                                          |
| 10 | Rpp2B    | 110 | Ribosomal protein P2 beta                                           |
| 9  | Rps0a&b  | 252 | Ribosomal 40S subunit protein S0                                    |
| 9  | RPS12    | 143 | Ribosomal 40S subunit protein S12                                   |
| 10 | Rps12    | 143 | Ribosomal 40S subunit protein S12                                   |
| 9  | Rps13    | 151 | Ribosomal 40S subunit protein S13                                   |
| 10 | Rps13    | 151 | Ribosomal 40S subunit protein S13                                   |
| 10 | Rps14    | 137 | Ribosomal 40S subunit protein S14                                   |
| 9  | RPS15    | 142 | Ribosomal 40S subunit protein S15                                   |
| 10 | RPS15    | 142 | Ribosomal 40S subunit protein S15                                   |
| 10 | Rps16A/B | 143 | Ribosomal 40S subunit protein S16                                   |
| 9  | RPS16A/B | 143 | Ribosomal 40S subunit protein S16                                   |
| 9  | Rps16A/B | 143 | Ribosomal 40S subunit protein S16                                   |
| 9  | Rps17    | 136 | Ribosomal 40S subunit protein S17                                   |
| 10 | Rps17    | 136 | Ribosomal 40S subunit protein S17                                   |
| 9  | RPS19A/B | 144 | Ribosomal 40S subunit protein S19                                   |
| 9  | Rps20    | 121 | Ribosomal 40S subunit protein S20                                   |
| 9  | RPS22    | 130 | Ribosomal 40S subunit protein S22                                   |
| 10 | RPS22    | 130 | Ribosomal 40S subunit protein S22                                   |
| 10 | RPS22    | 130 | Ribosomal 40S subunit protein S22                                   |
| 10 | RPS24A/B | 135 | Ribosomal 40S subunit protein S24                                   |
| 10 | RPS28    | 67  | Ribosomal 40S subunit protein S28                                   |
| 7  | Rps3     | 240 | Ribosomal 40S subunit protein S3                                    |
| 7  | RPS3     | 240 | Ribosomal 40S subunit protein S3                                    |
| 8  | RPS3     | 240 | Ribosomal 40S subunit protein S3                                    |
| 9  | RPS3     | 240 | Ribosomal 40S subunit protein S3                                    |
| 9  | RPS3     | 240 | Ribosomal 40S subunit protein S3                                    |
| 10 | RPS3     | 240 | Ribosomal 40S subunit protein S3                                    |
| 10 | Rps31    | 152 | Fusion protein cleaved to yield ribosomal protein S31 and ubiquitin |
| 10 | Rps31    | 152 | Fusion protein cleaved to yield ribosomal protein S31 and ubiquitin |

|    |                    |      |                                                                   |
|----|--------------------|------|-------------------------------------------------------------------|
| 9  | Rps4A/B            | 261  | Ribosomal 40S subunit protein S4                                  |
| 6  | RPS5               | 225  | Ribosomal 40S subunit protein S5                                  |
| 6  | RPS5               | 225  | Ribosomal 40S subunit protein S5                                  |
| 7  | Rps5               | 225  | Ribosomal 40S subunit protein S5                                  |
| 8  | RPS5               | 225  | Ribosomal 40S subunit protein S5                                  |
| 9  | RPS5               | 225  | Ribosomal 40S subunit protein S5                                  |
| 9  | RPS5               | 225  | Ribosomal 40S subunit protein S5                                  |
| 10 | Rps5               | 225  | Ribosomal 40S subunit protein S5                                  |
| 7  | RPS6               | 236  | Ribosomal 40S subunit protein S6                                  |
| 10 | Rps6               | 236  | Ribosomal 40S subunit protein S6                                  |
| 8  | RPS6A/B            | 236  | Ribosomal 40S subunit protein S6                                  |
| 7  | SEC17              | 292  | Alpha SNAP/vesicle fusion                                         |
| 7  | SEC17              | 292  | Alpha SNAP/vesicle fusion                                         |
| 3  | SEC23              | 768  | Component of COPII vesicle coat; GAP for Sar1                     |
| 4  | SEC23              | 768  | Component of COPII vesicle coat; GAP for Sar1                     |
| 3  | SEC24              | 926  | Component of COPII vesicle coat                                   |
| 3  | SEC24              | 926  | Component of COPII vesicle coat                                   |
| 3  | SEC26              | 973  | Beta subunit of the COPI coatomer                                 |
| 3  | SEC27              | 889  | Beta' subunit of the COPI coatomer                                |
| 3  | RPN2/SEN3          | 945  | 26S proteasome subunit                                            |
| 7  | RPN11              | 306  | Proteasome, Metalloprotease subunit of 19S regulatory particle    |
| 5  | RPN3               | 523  | Essential non-ATPase regulatory subunit of the 26S proteasome lid |
| 9  | SFT2               | 215  | syntxn 5-golgi to endosome(synt lw/ypt6, ric1, got1)              |
| 6  | SHM2               | 469  | seine hydroxymethyl transferase                                   |
| 3  | SKN1               | 771  | Protein involved in sphingolipid synth                            |
| 9  | SNA3               | 133  | Membrane Prot, MVB sorting                                        |
| 9  | SNA3               | 133  | Membrane Prot, MVB sorting                                        |
| 9  | SOD1               | 154  | Superoxide dismutase                                              |
| 4  | SSA2               | 639  | HSC chaperone SSA family                                          |
| 9  | SYN8               | 255  | Endosomal t-SNARE                                                 |
| 10 | SYN8               | 255  | Endosomal t-SNARE                                                 |
| 6  | TCP1               | 559  | Alpha subunit of chaperonin-containing T-complex                  |
| 7  | TDH1/2/3           | 332  | glyceraldehyde-3-phosphate dehydrogenase                          |
| 7  | TDH1/2/3           | 332  | glyceraldehyde-3-phosphate dehydrogenase                          |
| 6  | TDH3               | 332  | glyceraldehyde-3-phosphate dehydrogenase                          |
| 7  | TDH3               | 332  | glyceraldehyde-3-phosphate dehydrogenase                          |
| 6  | TLG1               | 224  | T-snare:late golgi                                                |
| 8  | TLG1               | 224  | T-snare:late golgi                                                |
| 9  | TLG1               | 224  | T-snare:late golgi                                                |
| 7  | TPM1               | 199  | tropomyosin                                                       |
| 8  | TPM2               | 161  | tropomyosin                                                       |
| 6  | TUB2               | 457  | Beta Tubulin                                                      |
| 1  | UBI                | 128  | Ubiquitin                                                         |
| 4  | UBI                | 128  | Ubiquitin                                                         |
| 6  | UBI                | 128  | Ubiquitin                                                         |
| 7  | UBI                | 128  | Ubiquitin                                                         |
| 5  | UGP1               | 499  | UDP-glucose pyrophosphorylase                                     |
| 6  | Virus Protein L-BC | 1512 | Viral poly protein Virus L-BC                                     |
| 4  | Viral Polyprot     | 1512 | Viral Poly Protein Virus L-BC                                     |



|    |                |      |                                                      |
|----|----------------|------|------------------------------------------------------|
| 3  | Viral Polyprot | 1512 | Viral Poly Protein Virus L-BC                        |
| 4  | Viral Polyprot | 1512 | Viral Poly Protein Virus L-BC                        |
| 7  | Viral Polyprot | 1512 | Viral Poly Protein Virus L-BC                        |
| 7  | Viral Polyprot | 1512 | Viral Poly Protein Virus L-BC                        |
| 5  | Viral Polyprot | 1512 | Viral Poly Protein Virus L-BC                        |
| 5  | VMA2           | 517  | Subunit B of V1 peripheral domain of vacuolar ATPase |
| 5  | VMA2           | 517  | Subunit B of V1 peripheral domain of vacuolar ATPase |
| 7  | VMA6           | 345  | vacuolar ATPase--Vo domain                           |
| 4  | VPS1           | 704  | Dynamin                                              |
| 5  | VPS1           | 704  | Dynamin                                              |
| 7  | VPS1           | 704  | Dynamin                                              |
| 3  | VPS1           | 704  | Dynamin                                              |
| 4  | VPS1           | 704  | Dynamin                                              |
| 2  | VPS10/PEP1     | 1577 | CPY sorting receptor                                 |
| 3  | VPS10/PEP1     | 1577 | CPY sorting receptor                                 |
| 6  | VPS10/PEP1     | 1577 | CPY sorting receptor                                 |
| 9  | VPS10/PEP1     | 1577 | CPY sorting receptor                                 |
| 3  | VPS10/PEP1     | 1577 | CPY sorting receptor                                 |
| 10 | VPS10/PEP1     | 1577 | CPY sorting receptor                                 |
| 5  | VPS17/PEP21    | 551  | Retromer subunit                                     |
| 3  | VPS35          | 944  | Retromer subunit                                     |
| 8  | VTI1           | 217  | v-Snare, interacts w/Sed5+Pep12                      |
| 9  | YCL012C        | 134  | Membrane protein, Unknown Function                   |
| 3  | YDJ1           | 409  | DNA J protein                                        |
| 5  | YDJ1           | 409  | DNA J protein                                        |
| 6  | YDJ1           | 409  | DNA J protein                                        |
| 7  | YDJ1           | 409  | DNA J protein                                        |
| 8  | YDJ1           | 409  | DNA J protein                                        |
| 9  | YDL121C        | 149  | ER Membrane Prot, function unknown                   |
| 7  | YIP5           | 310  | Transmembrane protein of late Golgi that binds YPTs  |
| 9  | ZEO1           | 113  | Zeocin resistance protein; Cell integrity pathway    |

**Supplemental Table S7: Protein hits found only in auxilin depletion fractions**

| Systematic Name*                 | Standard Name | Seq. Length | Protein name or Description                                       |
|----------------------------------|---------------|-------------|-------------------------------------------------------------------|
| <b>ER membrane proteins</b>      |               |             |                                                                   |
| YGL200C                          | EMP24         | 203         | Member of the p24 family involved in ER to Golgi transport        |
| YFL048C                          | EMP47         | 445         | Integral membrane component of ER-derived COPII vesicles          |
| YAR002C-A                        | ERP1          | 219         | Member of the p24 family involved in ER to Golgi transport        |
| YAL007C                          | ERP2          | 215         | Member of the p24 family involved in ER to Golgi transport        |
| YGL054C                          | Erv14         | 138         | COPII-coated vesicle protein                                      |
| YML012W                          | ERV25         | 211         | Member of the p24 family involved in ER to Golgi transport        |
| YDL121C                          | YDL121C       | 149         | ER Membrane Prot, function unknown                                |
| <b>COP subunits</b>              |               |             |                                                                   |
| YPR181C                          | SEC23         | 768         | Component of COPII vesicle coat; GAP for Sar1                     |
| YIL109C                          | SEC24         | 926         | Component of COPII vesicle coat                                   |
| YDR238C                          | SEC26         | 973         | Beta subunit of the COPI coatmer                                  |
| YGL137W                          | SEC27         | 889         | Beta' subunit of the COPI coatmer                                 |
| YFR051C                          | RET2          | 546         | Delta subunit of COPI Coatmer                                     |
| <b>Other membrane transport</b>  |               |             |                                                                   |
| YKR001C                          | VPS1          | 704         | Dynamin                                                           |
| YOR132W                          | VPS17/PEP21   | 551         | Retromer subunit                                                  |
| <b>Other membrane proteins</b>   |               |             |                                                                   |
| YJL172W                          | CPS1          | 576         | Vacuolar carboxypeptidase S                                       |
| YAL026C                          | DRS2          | 1355        | TGN aminophospholipid translocase (flippase)                      |
| YBR078W                          | ECM33         | 429         | GPI-anchored protein of unknown function                          |
| YMR058W                          | FET3          | 636         | Ferro-O2-oxidoreductase, Iron uptake, TM protein                  |
| YGL203C                          | KEX1          | 729         | Transmembrane carboxypeptidase of TGN                             |
| YDR483W                          | KRE2/MNT1     | 442         | Alpha1,2-mannosyltransferase of the Golgi                         |
| YML123C                          | PHO84         | 587         | High-affinity inorganic phosphate (Pi) transporter                |
| YJL151C                          | SNA3          | 133         | Membrane protein, MVB sorting                                     |
| YAL014C                          | SYN8          | 255         | Endosomal t-SNARE                                                 |
| YDR468C                          | TLG1          | 224         | T-snare late golgi                                                |
| YCL012C                          | YCL012C       | 134         | Membrane protein, Unknown Function                                |
| <b>Eisosome components</b>       |               |             |                                                                   |
| YPL004C                          | LSP1          | 341         | Eisosome core component                                           |
| YGR086C                          | PIL1          | 339         | Eisosome core component                                           |
| <b>Proteasome</b>                |               |             |                                                                   |
| YFR004W                          | RPN2/SEN3     | 945         | 26S proteasome subunit                                            |
| YIL075C                          | RPN11         | 306         | Proteasome, Metalloprotease subunit of 19S regulatory particle    |
| YER021W                          | RPN3          | 523         | Essential non-ATPase regulatory subunit of the 26S proteasome lid |
| NA                               | UBI           | 128         | Ubiquitin                                                         |
| <b>Metabolic processes</b>       |               |             |                                                                   |
| YNR016C                          | ACC1          | 2233        | Acetyl-CoA carboxylase                                            |
| YGR204W                          | ADE3          | 946         | C1-tetrahydrofolate synthase                                      |
| YMR116C                          | ASC1          | 319         | G-protein beta subunit/guanine dissociation inhibitor for Gpa2p   |
| YLR258W                          | GSY2          | 705         | Glycogen synthase                                                 |
| YJR104C                          | SOD1          | 154         | Superoxide dismutase                                              |
| YKL035W                          | UGP1          | 499         | UDP-glucose pyrophosphorylase                                     |
| <b>Chaperone/Protein folding</b> |               |             |                                                                   |
| YDL126C                          | CDC48         | 835         | AAA ATPase                                                        |
| YDR212W                          | TCP1          | 559         | Alpha subunit of chaperonin-containing T-complex                  |
| YNL064C                          | YDJ1          | 409         | DNA J protein                                                     |
| <b>Cytoskeleton</b>              |               |             |                                                                   |
| YNL079C                          | TPM1          | 199         | Tropomyosin                                                       |
| YIL138C                          | TPM2          | 161         | Tropomyosin                                                       |
| YFL037W                          | TUB2          | 457         | Beta Tubulin                                                      |

\*Notes: Proteins involved in translation were eliminated from the auxilin only hit list.
